# Supplementary material for: Embryonic vitamin D deficiency programs hematopoietic stem cells to induce type 2 diabetes
Source: Springer Nature journal article supplement (doi:10.1038/s41467-023-38849-z), 2023-06-13
Supplement: MOESM1 [file 41467_2023_38849_MOESM1_ESM.pdf]

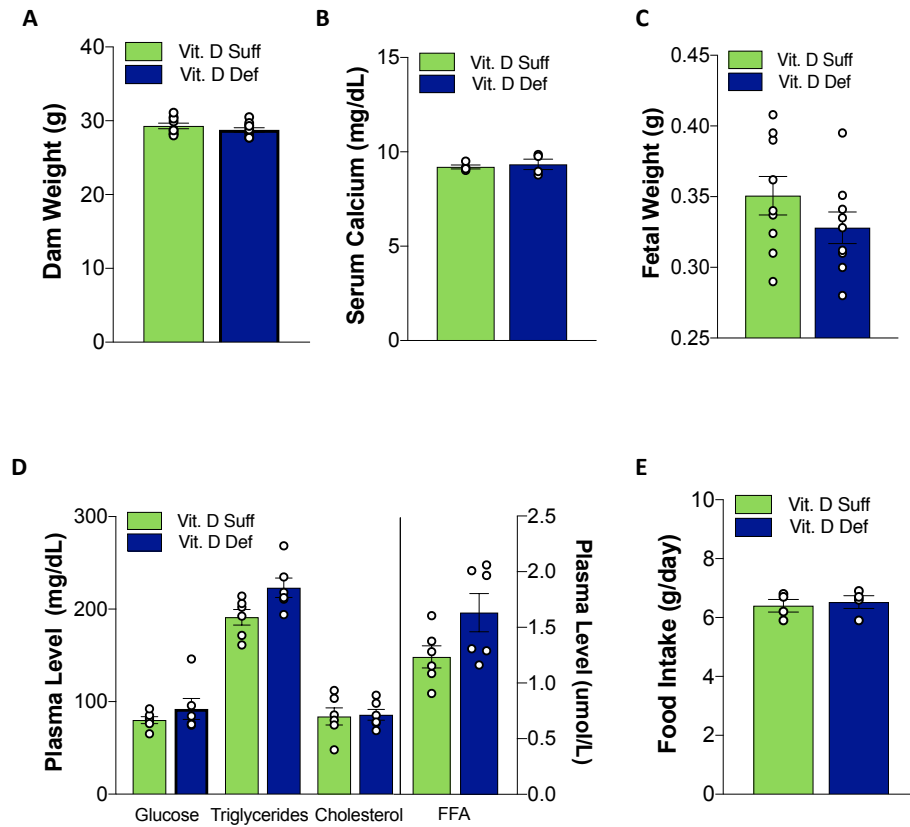

**Supplemental Figure 1. Maternal vitamin D deficiency during pregnancy does not alter metabolic parameters in dams.** (A) Dam weight (n=9 vitamin D sufficient, n=10 vitamin D deficient), (B) dam serum calcium (n=4 per group), (C) fetal weight (n=7 per group), (D) dam plasma fasting glucose and lipids (n=6 per group), and (E) dam food intake (n=4 per group) in vitamin D-sufficient or -deficient mice pregnant at 13 days and their fetuses. Data presented as mean  $\pm$  SEM.

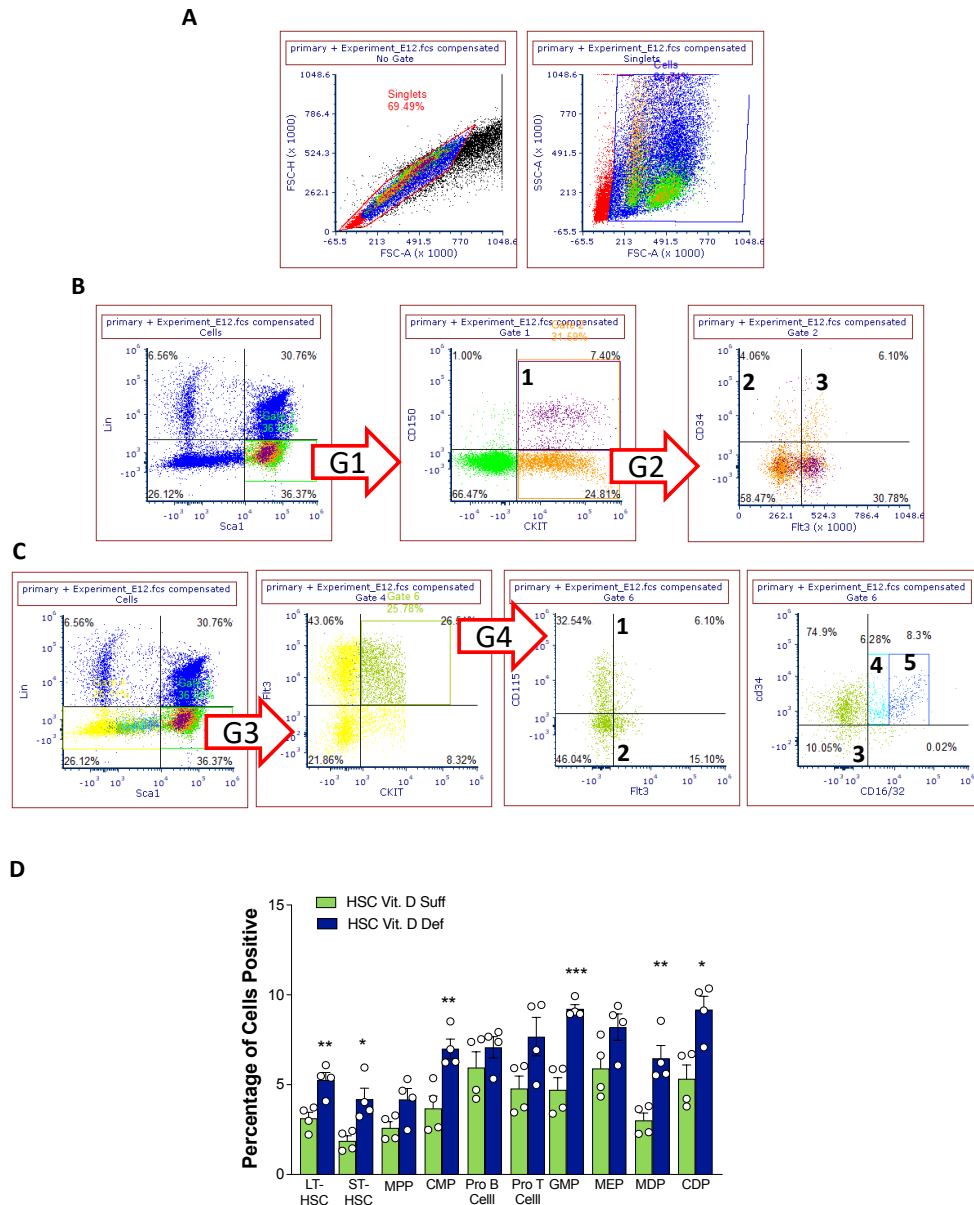

**Supplemental Figure 2. The Prevalence of Myeloid Progenitors and Long-term and Short-term HSCs is Increased in Fetal Liver Donor Cells Isolated from VD deficient Embryos.** Fetal liver cells were isolated from VD sufficient and deficient dams at day 13.5 and subjected to flow cytometry analysis to determine the prevalence of long-term (LT) and short-term (ST) HSCs, common myeloid progenitors (CMP), granulocyte-macrophage progenitors (GMP), megakaryocyte erythroid progenitors (MEP), and macrophage dendritic cell progenitors (MDP). (A-C) Gating strategy of HSC characterization. (A) Gating of singlets and cells based on FSC and SSC properties. (B) Gating strategy for identification of (# 1) long-term HSCs (LT-HSCs), (#2) short-term HSCs (ST-HSCs), and (#3) multipotent progenitors (MPP). (C) Gating strategy for identification of (# 1) macrophage dendritic cell progenitors (MDP) and (# 2) conventional dendritic cell progenitors (CDP). c-Kit<sup>+</sup> Flt3<sup>+</sup> were also plotted by CD16/32 CD34 identifying (#3) megakaryocytes erythroid progenitors (MEP); (# 4) common myeloid progenitors (CMP); and (# 5) granulocyte-macrophage progenitors (GMP). (D) Summary of the abundances of hematopoietic cell progenitors from VD- vs. VD+ FL-HSCs. (n= 4/group) Data presented as mean  $\pm$  SEM. \* $p$ <0.05, \*\* $p$ <0.01, \*\*\* $p$ <0.001 by two-tailed unpaired t-test. Actual  $p$  values are shown in the source data file.

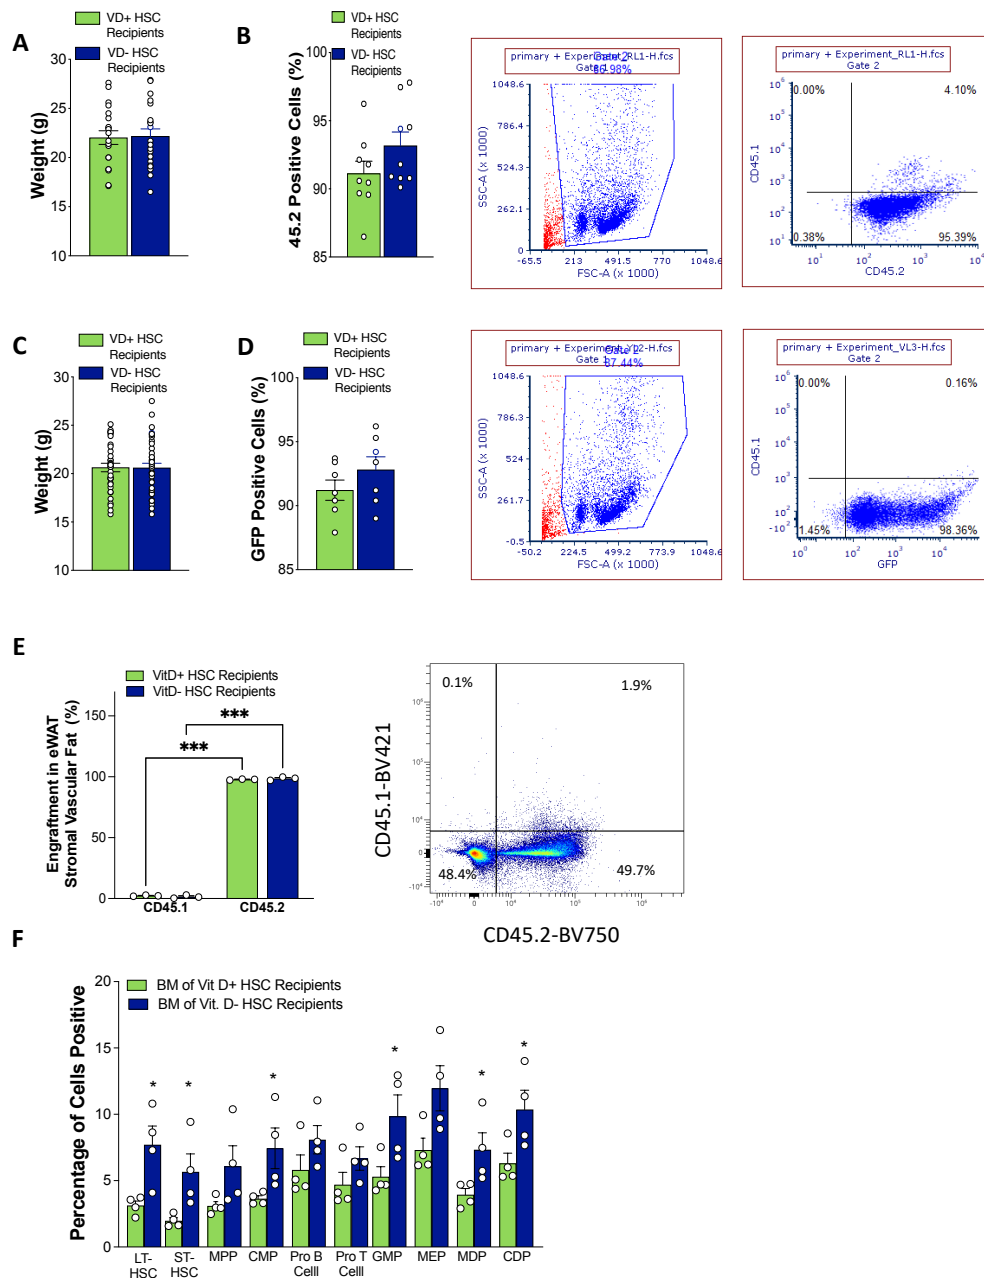

**Supplemental Figure 3. Vitamin D status of HSCs does not alter recipient weight or engraftment.** HSCs isolated from embryos exposed to in-utero vitamin D sufficiency or deficiency were transplanted into vitamin D-sufficient recipient mice in C57BL6 and LDLR<sup>-/-</sup> backgrounds. (A) Weight (n=20 per group) and (B) percentage of circulating CD14<sup>+</sup> 45.2<sup>+</sup> cells assessed by flow cytometry (n=9 per group) was measured 8 weeks after transplantation into C57BL6 (CD45.1<sup>+</sup>) recipient mice. (C) Weight (n=35 VD+, n=38 VD-) and (D) percentage of circulating GFP<sup>+</sup> cells (n=7 per group) were measured 8 weeks after transplantation into LDLR<sup>-/-</sup>GFP<sup>-/-</sup> recipient mice. (E) The percentage of 45.1<sup>+</sup> and 45.2<sup>+</sup> cells from epididymal stromal vascular fat (SVF) was also measured 30 weeks post-transplant (n=3 per group) in the C57BL6 transplant model. (F) Prevalence of immune cell progenitors in BM from primary transplant recipients at 26 weeks in the C57BL6 transplant model (n=4/group). Analyzed as in Fig S2. Data presented as mean  $\pm$  SEM. \*p<0.05, \*\*\*p<0.001 by two-tailed unpaired t-test. Actual p values are shown in the source data file.

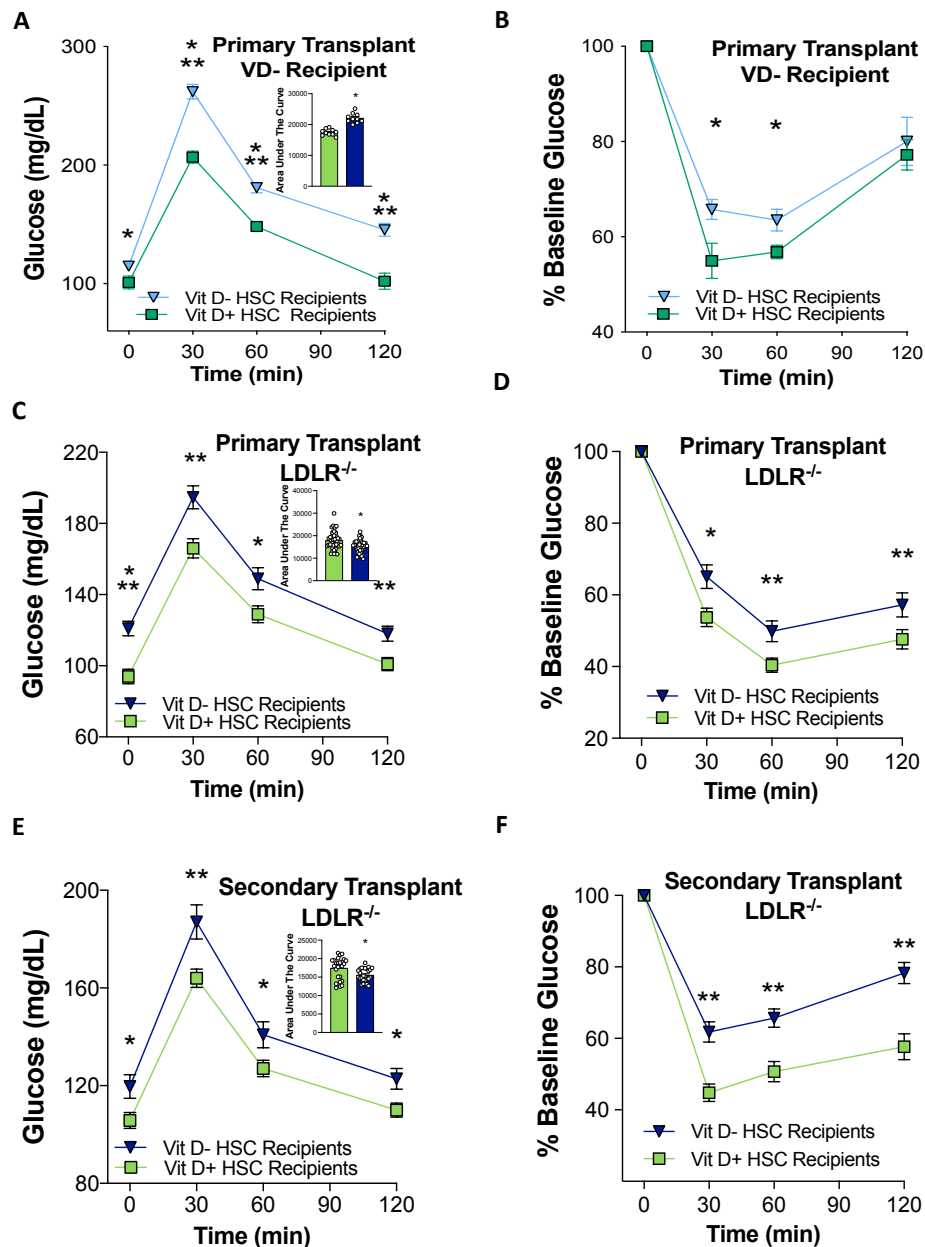

**Supplemental Figure 4. In utero, vitamin D deficiency reprograms HSCs to transfer insulin resistance in C57BL/6 or LDLR<sup>-/-</sup> background.** (A, B) HSCs isolated from embryos exposed to in-utero vitamin D sufficiency or deficiency were transplanted into vitamin D-deficient recipient mice. Glucose and insulin tolerance tests were performed at (A, B) 8 weeks; n=10/group. (C, D) Vitamin D sufficient LDLR<sup>-/-</sup> GFP<sup>-/-</sup> recipient mice were transplanted with VD(-) (n=38) or VD(+) FL-HSCs from LDLR<sup>-/-</sup> GFP<sup>+/+</sup> (n=42)(primary transplant). (E, F) Bone marrow from VD(-) (E: n=27 or F: n=21) or VD(+) (E: n=26; F: n=21) FL-HSCs LDLR<sup>-/-</sup> GFP<sup>+/+</sup> primary recipient was then used as a transplant donors for vitamin D sufficient mice (secondary transplant). Glucose and insulin tolerance tests were performed at (C, D) 8 weeks post-primary-transplants and (E, F) 8 weeks post-secondary-transplant. Data presented as mean  $\pm$  SEM. \*p<0.05, \*\*p<0.01, \*\*\*p<0.001 vs. primary or secondary recipients of VD(+) HSCs by two-tailed unpaired t-test. Actual p values are shown in the source data file.

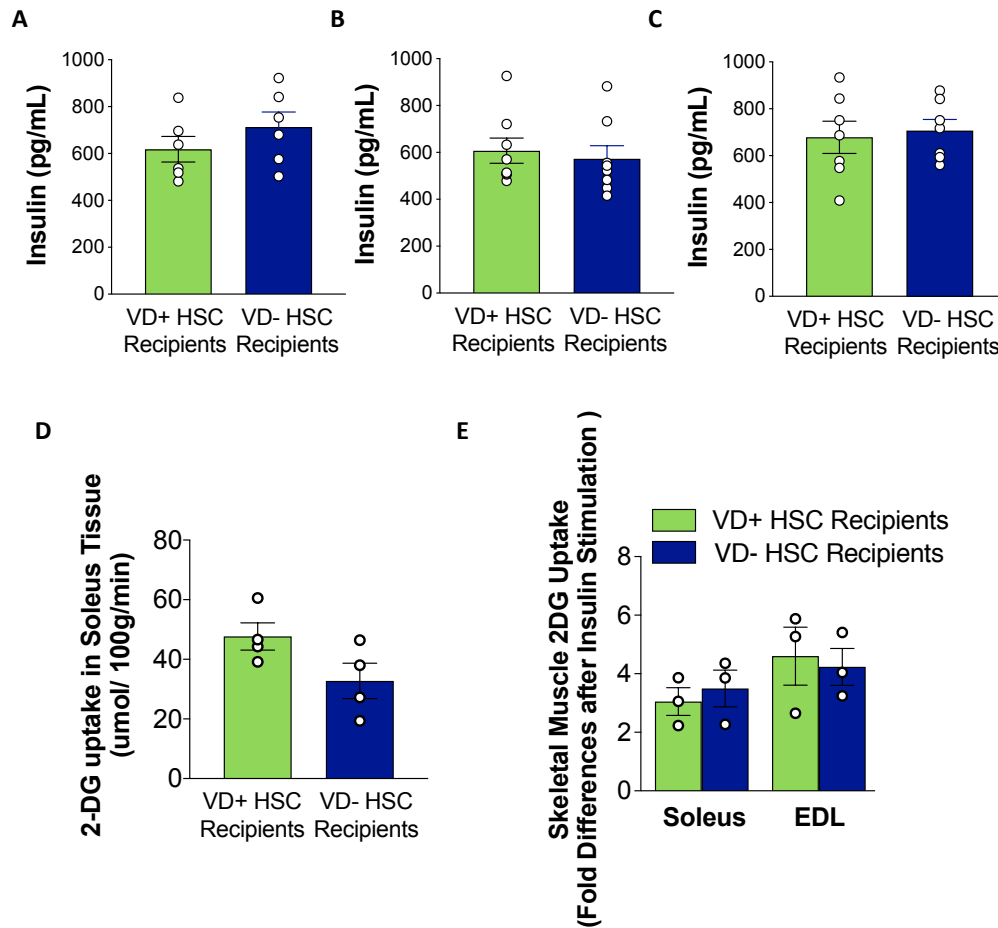

**Supplemental Figure 5. Recipient insulin levels after glucose challenge and skeletal muscle insulin resistance are not affected by the vitamin D status of HSCs.** Vitamin D sufficient CD45.1<sup>+</sup> C57BL6 mice were transplanted with VD(-) or VD(+) FL-HSCs from C57BL6 mice CD45.2<sup>+</sup> (primary transplant). Primary recipient BM was then used as a transplant donor for vitamin D sufficient mice (secondary transplant). Plasma insulin levels were measured 30 min after glucose challenge (**A**) 8 weeks after transplantation (n= 6 per group), (**B**) 6 months after transplantation (n=8 per group), and (**C**) 8 weeks after secondary transplantation (n=7 per group). Skeletal muscle insulin sensitivity was measured in primary recipients 8 weeks post-transplant by (**D**) 2-deoxyglucose (2-DG) uptake in soleus muscle during hyperinsulinemic-euglycemic clamps (n=4 per group) and (**E**) insulin-stimulated 2-DG uptake by ex vivo soleus and extensor digitorum longus muscle (EDL) (n=3 per group). Data presented as mean  $\pm$  SEM.

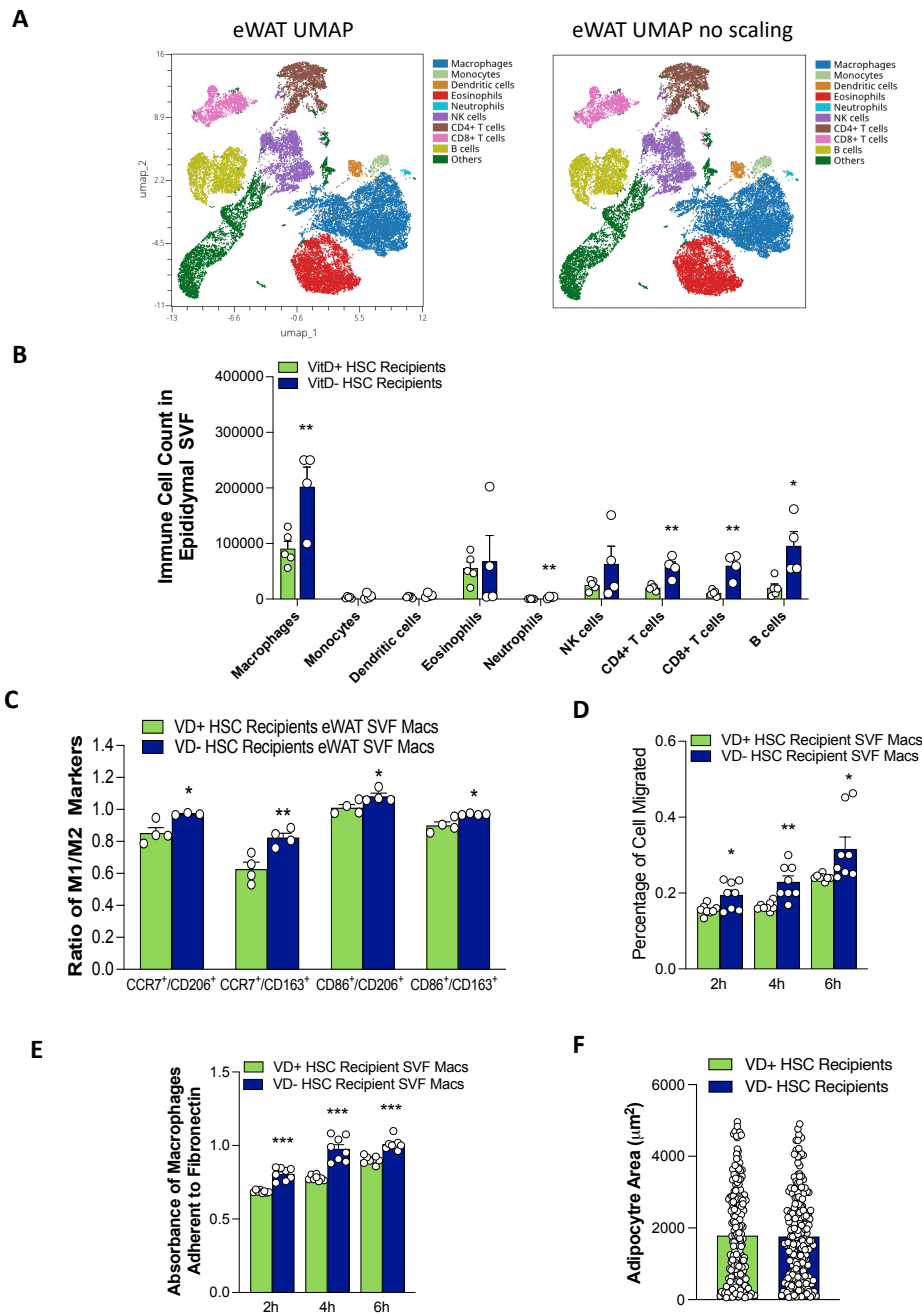

**Supplemental Figure 6. Characterization of Immune Cell Infiltration into Tissues.** (A-E) Data from Epididymal SVF. (A, B) UMAP visualization of cytometry data from CD45<sup>+</sup> eWAT SVF cells (n = 4 per group). Immune cell populations were identified using the FlowSOM algorithm. (B) Quantification of immune cell counts in SVF. (C) Markers of M1(CCR7-CD86)/M2(CD163-206) macrophage phenotype were characterized by flow cytometry (n = 4/group). (D) Transwell migration: percentage of  $3 \times 10^5$  CD14<sup>+</sup> eWAT SVF macrophages that migrate in response to MCP-1 stimulation (n=8 per group). (E) The absorbance of CD14<sup>+</sup> eWAT SVF monocytes adheres to fibronectin (n = 8 per group). (F) Adipocyte size was measured in a minimum of 198 adipocytes from tissue slices from 3 mice/group using ImageJ software. Data presented as mean  $\pm$  SEM. \*p<0.05, \*\*p<0.01, \*\*\*p<0.001 by two-tailed unpaired t-test. Actual p values are shown in the source data file.

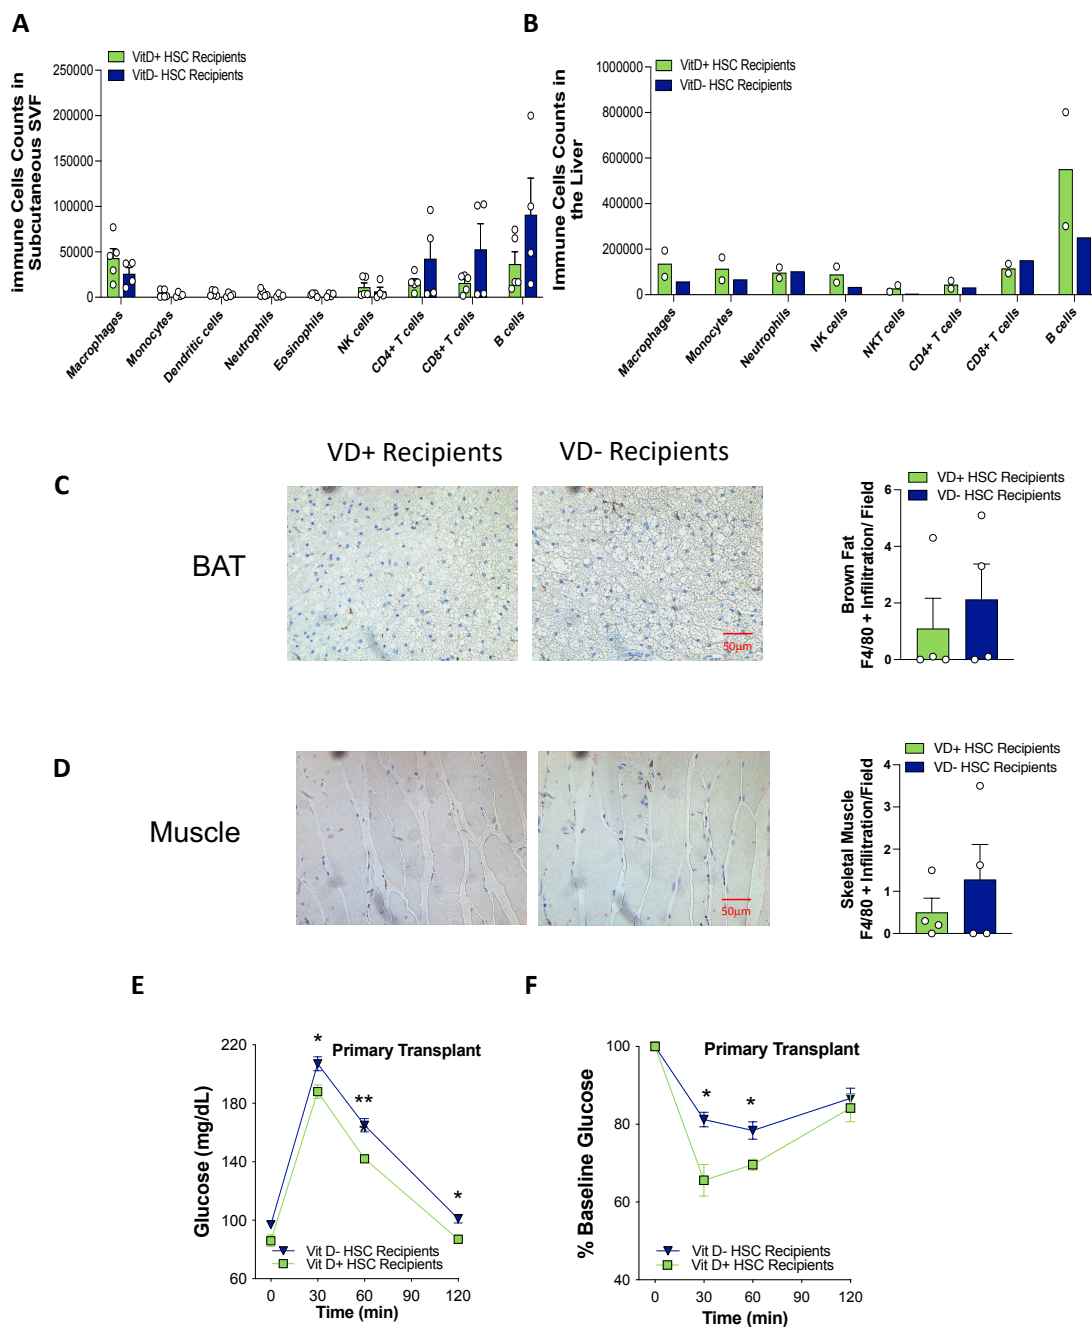

**Supplemental Figure 7. Immune Cell Infiltration into Metabolic Tissues.** Data from UMAP visualization of cytometry data from CD45.2+ subcutaneous SVF (A) or liver cells (B) (SubCu  $n = 5$ /group; liver  $n = 2$ /group). Macrophage infiltration was assessed by F4/80 immunohistochemistry in brown fat (C) and muscle (D). The percentage of F4/80 positive cells was determined by manually counting 15 representative fields under 20x magnification ( $n=4$ /group). Representative images are shown at 40x magnification. (E,F) Glucose and insulin tolerance test at 30 weeks post-transplant when tissues were obtained to characterize the immune cells ( $n=4$ /group). Data presented as mean  $\pm$  SEM. \* $p < 0.05$ , \*\* $p < 0.01$  by two-tailed unpaired t-test. Actual  $p$  values are shown in the source data file.

**A**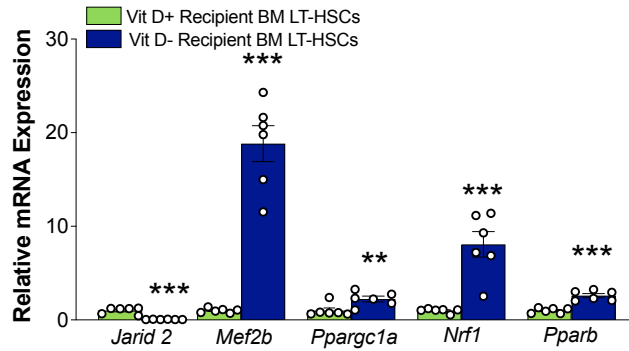**B**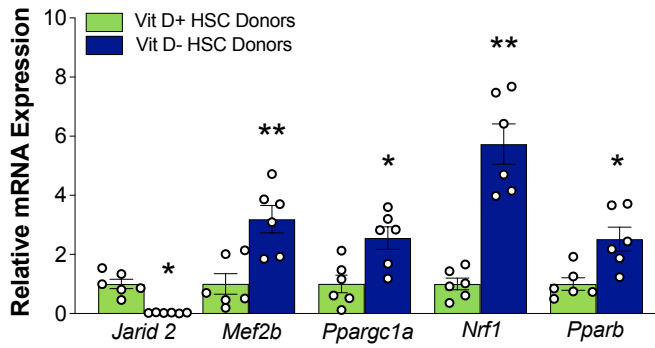**C**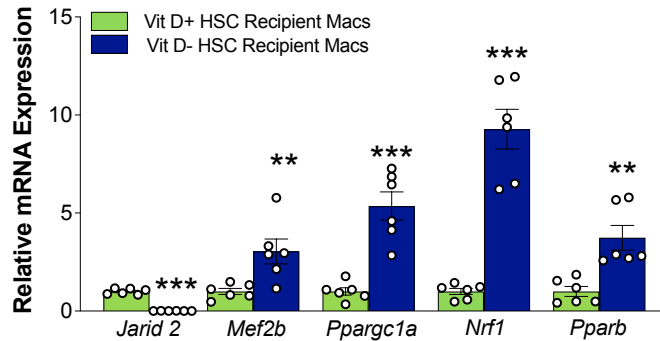

**Supplemental Figure 8. In utero, vitamin D deficiency activates the Jarid2/Mef2/PGC1 $\alpha$  network in immune cells.** Quantitative RT-PCR of target genes of the Jarid2 and PGC1 $\alpha$  network in (A) recipient BM LT-HSCs, (n=4/group), (B) LT-HSC donor cells, (n=4/group) and (C) in peritoneal macrophages from FL-HSC transplant recipients (n=6/group). Data presented as mean  $\pm$  SEM. \*p<0.05, \*\*p<0.01, \*\*\*p<0.001 by two-tailed unpaired t-test. Actual p values are shown in the source data file.



**A**

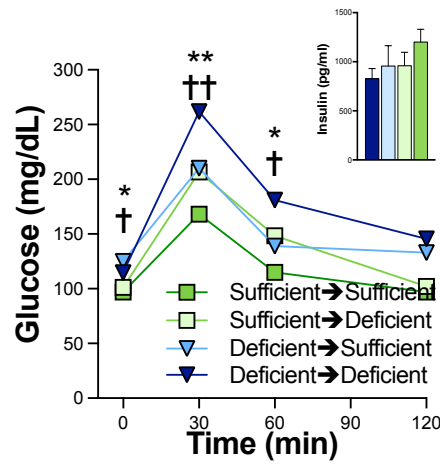

**B**

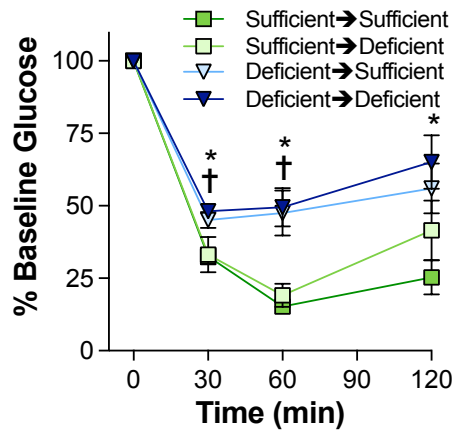

**Supplemental Figure 9: VD supplementation after birth does not correct insulin resistance in mice born VD deficient.** Offspring born VD deficient or sufficient were transitioned to VD deficient or sufficient diets for eight weeks. (A) Glucose tolerance test performed at 8 weeks (Suff→Suff n= 8, Suff→Def n=16, Def→Suff n=8, and Def→Def n=11). (B) Insulin tolerance test performed at 8 weeks (Suff→Suff n= 7, Suff→Def n=7, Def→Suff n=14, and Def→Def n=19). Data presented as mean ± SEM. \*p<0.05, \*\*p<0.01, \*\*\*p<0.001 Def→Def vs Suff→Suff VD and †p<0.05; ††p<0.01 for Def→Def vs. Suff→Def by ANOVA followed by Tukey's comparisons. Actual p values are shown in the source data file.

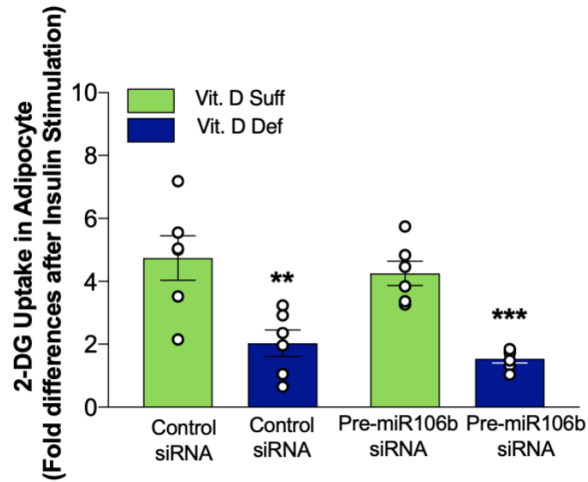

**Supplemental Figure 10: Endogenous miR-106b-5p production by the adipocyte does not affect 2-DG uptake.** Insulin-stimulated 2-DG uptake in 3T3-L1 adipocytes transfected with premiR-106b-siRNA or control-siRNA and exposed to conditioned media from peritoneal macrophages from VD(+) and VD(-)FL-HSCs recipients (n=6 per group). Data presented as mean ± SEM. \*\*p<0.01, \*\*\*p<0.005 by two-tailed unpaired t-test. Actual p values are shown in the source data file.

## Enrichr Pathway Analysis

### Top Up Regulated Pathways

| Term (ESCAPE DATABASE)    | Overlap # Genes | P-value     | Adjusted P-value |
|---------------------------|-----------------|-------------|------------------|
| JARID2-20075857 DOWN      | 42/1107         | 2.93E-06    | 9.22E-04         |
| CHiP MYC-18555785         | 40/1200         | 9.59E-05    | 0.015107269      |
| CHiP MYC-19079543         | 44/1458         | 3.87E-04    | 0.040608705      |
| mESC H3K36me3 18692474    | 66/2469         | 4.14E-04    | 0.032576428      |
| CHiP CHD1-19587682        | 27/843          | 0.002365341 | 0.149016486      |
| Term (WikiPathways)       | Overlap # Genes | P-value     | Adjusted P-value |
| Macrophage markers WP2271 | 3/10            | 7.97E-04    | 0.140340284      |
| Purine metabolism WP2185  | 8/171           | 0.019228259 | 1                |
| Nucleotide GPCRs WP207    | 2/12            | 0.021998268 | 1                |
| Keap1-Nrf2 WP1245         | 2/14            | 0.0295646   | 1                |
| Adipogenesis genes WP447  | 6/134           | 0.047663558 | 1                |

### Top Down Regulated Pathways

| Term (GO Biological Process)                                                  | Overlap # Genes | P-value    | Adjusted P-value |
|-------------------------------------------------------------------------------|-----------------|------------|------------------|
| Viral myocarditis                                                             | 11/87           | 1.28E-04   | 0.03889199       |
| Autoimmune thyroid disease                                                    | 9/78            | 0.00101947 | 0.15445045       |
| Allograft rejection                                                           | 8/63            | 0.00102296 | 0.10331917       |
| Graft-versus-host disease                                                     | 7/64            | 0.00490449 | 0.37151542       |
| Type I diabetes mellitus                                                      | 7/69            | 0.00740514 | 0.44875171       |
| Epstein-Barr virus infection                                                  | 15/229          | 0.00892602 | 0.45076386       |
| Viral carcinogenesis                                                          | 15/229          | 0.00892602 | 0.38636902       |
| Term (KEGG Pathways)                                                          | Overlap # Genes | P-value    | Adjusted P-value |
| Positive regulation of stress-activated MAPK cascade (GO:0032874)             | 9/80            | 0.00122346 | 1                |
| Regulation of membrane depolarization (GO:0003254)                            | 4/16            | 0.00153194 | 1                |
| Positive regulation of early endosome to late endosome transport (GO:2000643) | 3/8             | 0.00174629 | 1                |
| Regulation of JNK cascade (GO:0046328)                                        | 9/90            | 0.0027913  | 1                |
| Positive regulation of JNK cascade (GO:0046330)                               | 8/76            | 0.00343504 | 1                |

**Table S1. EnrichR pathway analysis.**

## Methylation Assay Coordinates

| Assay ID | Assay Location   | From ATG         | From TSS         | GRCh38 (+)              | # of CpG |
|----------|------------------|------------------|------------------|-------------------------|----------|
| ASY3159  | 5'-Upstream      | -2453 to -2351   | -1852 to -1750   | Chr13:44729419-44729521 | 6        |
| ASY3160  | 5'-Upstream      | -2211 to -2124   | -1610 to -1523   | Chr13:44729661-44729748 | 9        |
| ASY3162  | 5'-Upstream      | -1157 to -1122   | -556 to -521     | Chr13:44730715-44730750 | 4        |
| ASY3163  | 5'-Upstream      | -704 to -649     | -103 to -48      | Chr13:44731168-44731223 | 6        |
| ASY3164  | Exon 1, Intron 1 | 45 to 89         | 646 to 690       | Chr13:44731916-44731960 | 2        |
| ASY3166  | Intron 1         | 2149 to 2235     | 2750 to 2836     | Chr13:44734020-44734106 | 9        |
| ASY3167  | Intron 1         | 35922 to 35937   | 36523 to 36538   | Chr13:44767793-44767808 | 2        |
| ASY3168  | Intron 1         | 39152 to 39183   | 39753 to 39784   | Chr13:44771023-44771054 | 3        |
| ASY1677  | Intron 1         | 42317 to 42469   | 42918 to 43070   | Chr13:44774188-44774340 | 4        |
| ASY1678  | Intron 1         | 42675 to 42679   | 43276 to 43280   | Chr13:44774546-44774550 | 2        |
| ASY3169  | Intron 1         | 48158            | 48759            | Chr13:44780029          | 1        |
| ASY3170  | Intron 2         | 108192 to 108219 | 108793 to 108820 | Chr13:44840063-44840090 | 2        |
| ASY3173  | Intron 2         | 110157 to 110181 | 110758 to 110782 | Chr13:44842028-44842052 | 2        |
| ASY3175  | Intron 2         | 112064 to 112117 | 112665 to 112718 | Chr13:44843935-44843988 | 3        |
| ASY3176  | Intron 3         | 119607 to 119651 | 120208 to 120252 | Chr13:44851478-44851522 | 2        |
| ASY3178  | Intron 3         | 125037 to 125120 | 125638 to 125721 | Chr13:44856908-44856991 | 3        |
| ASY3179  | Intron 4         | 148554           | 149155           | Chr13:44880425          | 1        |
| ASY3180  | Intron 5         | 158766           | 159367           | Chr13:44890637          | 1        |
| ASY3181  | Intron 5         | 159670 to 159719 | 160271 to 160320 | Chr13:44891541-44891590 | 2        |
| ASY3184  | Intron 7         | 172605           | 173206           | Chr13:44904476          | 1        |
| ASY3185  | Intron 8         | 174879 to 174908 | 175480 to 175509 | Chr13:44906750-44906779 | 2        |
| ASY3186  | Intron 9         | 176115 to 176136 | 176716 to 176737 | Chr13:44907986-44908007 | 2        |
| ASY3188  | Exon 10          | 178525 to 178563 | 179126 to 179164 | Chr13:44910396-44910434 | 3        |
| ASY3190  | 3'-UTR           | 188691 to 188728 | 189292 to 189329 | Chr13:44920562-44920599 | 3        |

**Table S2. Next-generation sequencing methylation assay coordinates.**

## List of down regulated microRNAs in Recipients Bone Marrow Cells

| Gene Symbol | Mean expression recipients of VD- FL-HSC | Mean expression recipients of VD+ FL-HSC | Ratio Recipient VD- FL-HSC /VD+ FL-HSC | P Value  |
|-------------|------------------------------------------|------------------------------------------|----------------------------------------|----------|
| Mir19b-1    | 8.35                                     | 14.53                                    | 0.57                                   | 2.64E-03 |
| Mir106b     | 9.83                                     | 14.60                                    | 0.67                                   | 1.12E-02 |
| Mir142      | 80.10                                    | 111.27                                   | 0.72                                   | 2.85E-02 |
| Mir331      | 9.85                                     | 13.76                                    | 0.72                                   | 2.21E-02 |
| Mirlet7g    | 13.20                                    | 18.00                                    | 0.73                                   | 1.76E-02 |
| Mir340      | 23.68                                    | 32.16                                    | 0.74                                   | 1.29E-02 |
| Mir330      | 32.60                                    | 41.23                                    | 0.79                                   | 4.36E-03 |
| Mir376b     | 3.49                                     | 4.33                                     | 0.80                                   | 2.72E-02 |
| Mir666      | 53.52                                    | 58.36                                    | 0.92                                   | 3.02E-02 |
| Mir679      | 25.32                                    | 28.72                                    | 0.88                                   | 3.32E-02 |
| Mir467b     | 3.49                                     | 3.85                                     | 0.91                                   | 3.66E-02 |
| Mir125a     | 24.14                                    | 27.91                                    | 0.86                                   | 4.57E-02 |
| Mir92b      | 73.49                                    | 81.69                                    | 0.90                                   | 1.08E-02 |

**Table S3. Down-regulate miRNAs from HSC transplant bone marrow.**

## Demographic Characteristics of Population at Delivery

| Maternal Characteristics             | (N=30)          |
|--------------------------------------|-----------------|
| Age in years (Mean $\pm$ SE)         | 28.4 $\pm$ 1.1  |
| African American (%)                 | 50              |
| Caucasian (%)                        | 47              |
| Asian (%)                            | 3               |
| Pre-pregnancy BMI (Mean $\pm$ SE)    | 27.7 $\pm$ 1.32 |
| BMI At Delivery (Mean $\pm$ SE)      | 32.6 $\pm$ 1    |
| Vaginal Delivery (%)                 | 53              |
| C-Section Delivery (%)               | 47              |
| Prenatal Vitamin Supplementation (%) | 96%             |
| Infant Characteristics               |                 |
| Gender Females (%)                   | 57              |
| Birth Weight (g) (Mean $\pm$ SE)     | 3422 $\pm$ 81   |
| Birth Height (cms) (Mean $\pm$ SE)   | 50.7 $\pm$ 0.36 |

**Table S4. Demographic characteristics of the population at delivery.**
